1  
2  
3 **Hypoxic gene expression in chronic hepatitis B infected patients is not observed in state-of-art**  
4 ***in vitro* and mouse infection models.**

5  
6 PJ Liu<sup>1</sup>, JM Harris<sup>1</sup>, E Marchi<sup>2</sup>, V D'Arienzo<sup>1</sup>, T Michler<sup>3</sup>, PAC Wing<sup>1</sup>, A Magri<sup>1</sup>,  
7 AM Ortega-Prieto<sup>4</sup>, M van de Klundert<sup>3</sup>, J Wettengel<sup>3</sup>, D Durantel<sup>5</sup>, M Dorner<sup>4†</sup>,  
8 P. Klenerman<sup>2</sup>, U Protzer<sup>3</sup>, S Giotis<sup>4</sup> and JA McKeating<sup>1\*</sup>

- 9  
10 1. Nuffield Department of Medicine Research Building, University of Oxford, Oxford, OX3 7LF. UK.  
11  
12 2. Medawar Building, University of Oxford, South Parks Road, Oxford OX1 3SY. UK.  
13  
14 3. Institute of Virology, Technical University of Munich/Helmholtz Zentrum München, Trogerstrasse 30,  
15 81675, Munich, Germany.  
16  
17 4. Section of Molecular Virology, Department of Infectious Diseases, Imperial College London, London, W2  
18 1PG, UK.  
19  
20 5. Cancer Research Center of Lyon (CRCL), INSERM U1052, and University of Lyon (UCBL1), Lyon, France  
21

22  
23 \* *Communicating author and †deceased author*  
24

25 **ABSTRACT**

26 Hepatitis B virus (HBV) is the leading cause of hepatocellular carcinoma (HCC) worldwide. The prolyl hydroxylase  
27 domain (PHD)-hypoxia inducible factor (HIF) pathway is a key mammalian oxygen sensing pathway and is frequently  
28 perturbed by pathological states including infection and inflammation. We discovered a significant upregulation of  
29 hypoxia regulated gene transcripts in patients with chronic hepatitis B (CHB) in the absence of liver cirrhosis. We used  
30 state-of-the-art *in vitro* and *in vivo* HBV infection models to evaluate a role for HBV infection and the viral regulatory  
31 protein HBx to drive HIF-signalling. HBx had no significant impact on HIF expression or associated transcriptional  
32 activity under normoxic or hypoxic conditions. Furthermore, we found no evidence of hypoxia gene expression in HBV  
33 *de novo* infection, HBV infected human liver chimeric mice or transgenic mice with integrated HBV genome.  
34 Collectively, our data show clear evidence of hypoxia gene induction in CHB that is not recapitulated in existing models  
35 for acute HBV infection, suggesting a role for inflammatory mediators in promoting hypoxia gene expression.  
36

## 1 INTRODUCTION

2

3 HBV is a global health problem with more than 250 million people chronically infected and at least 780,000  
4 deaths/year from HBV-related liver diseases such as liver cirrhosis and hepatocellular carcinoma (HCC)<sup>1,2</sup>. HBV  
5 replicates in hepatocytes within the liver and current anti-viral treatments suppress viral replication but are not  
6 curative, largely due to the persistence of the viral covalently closed circular DNA (cccDNA) reservoir<sup>3</sup>. Chronic  
7 hepatitis B (CHB) is a virus-associated, inflammatory liver disease and one of the leading causes of HCC<sup>4</sup>, one of the  
8 fastest rising and fourth most common cause of cancer related-death world-wide<sup>5</sup>. Curative therapies (tumour  
9 ablation, resection or liver transplantation) are dependent on early detection, however, the majority of HBV and non-  
10 viral associated HCC cases are diagnosed at a late stage often resulting in a poor prognosis<sup>6</sup>. Despite significant  
11 advances in our understanding of the HBV replicative life cycle, the mechanisms underlying HCC pathogenesis are not  
12 well defined<sup>7</sup>.

13

14 Although liver cirrhosis is a major risk factor for developing HCC, however, 10-20% of HBV infected patients that  
15 develop HCC are non-cirrhotic, highlighting a role for HBV to promote carcinogenesis via direct and indirect  
16 inflammatory mechanisms<sup>7</sup>. Three major and non-exclusive viral-dependent pathways have been proposed: (i)  
17 integration of viral DNA into the host genome; (ii) expression of viral oncogenic proteins and (iii) viral-driven changes  
18 in host gene transcription (reviewed in<sup>8</sup>). The viral encoded regulatory hepatitis B X protein (HBx) has been reported  
19 to promote the expression of both viral and selected host genes, where a recent study reported HBx binding to >5,000  
20 host genes with diverse roles in metabolism, chromatin maintenance and carcinogenesis<sup>9</sup>. There is clearly an urgent  
21 need to increase our understanding of HBV mediated carcinogenesis to support the development of tools to identify  
22 CHB patients at risk of HCC development.

23

24 The liver receives oxygenated blood from the hepatic artery and oxygen-depleted blood via the hepatic portal vein,  
25 resulting in an oxygen gradient of 8-4% across the periportal and pericentral areas, respectively<sup>10</sup>. This oxygen gradient  
26 has been reported to associate with liver zonation, a phenomenon where hepatocytes show distinct functional and  
27 structural heterogeneity across the parenchyma<sup>11,12</sup>. Recent single-cell RNA sequencing analysis of the mouse liver  
28 highlight a major role for hypoxic and Wnt signalling pathways to shape liver zonation profiles in the normal healthy  
29 liver with an enrichment of hypoxic gene expression in the pericentral area<sup>13</sup>. Importantly, this oxygen gradient is  
30 readily perturbed in pathological states such as infection, inflammation and cirrhosis<sup>14</sup>. One of the most well studied  
31 oxygen sensing mechanisms is the hypoxia inducible factor (HIF) pathway<sup>15</sup>. As HIF-signalling pathways are altered in  
32 many diseases, including cancer and inflammatory conditions, pharmacological approaches to modulate HIF activity  
33 offer promising therapeutic opportunities<sup>16,17</sup>. When oxygen is abundant, newly synthesised HIF $\alpha$  subunits, including  
34 HIF-1 $\alpha$  and HIF-2 $\alpha$  isomers, are rapidly hydroxylated by prolyl-hydroxylase domain (PHD) proteins and targeted for  
35 poly-ubiquitination and proteasomal degradation. In contrast when oxygen is limited these HIF $\alpha$  subunits translocate  
36 to the nucleus, dimerize with HIF- $\beta$  and positively regulate the transcription of a myriad of host genes involved in cell

1 metabolism, proliferation, angiogenesis and immune regulation. Dai *et al.* reported that increased HIF-1 $\alpha$  mRNA and  
2 protein expression in HCC are prognostic for more advanced disease stages and poor overall survival post-surgical  
3 tumour resection<sup>18</sup>. Furthermore, Xiang *et al.* and Zheng *et al.* showed that HIF-1 $\alpha$  protein expression is predictive of  
4 HCC lymph node metastasis and vascular invasion<sup>19,20</sup>. Thus, HIF signalling could have an important role in progressive  
5 liver disease and HCC development<sup>14</sup>.

6  
7 In addition to hypoxia, inflammation, oxidative stress and viral infection can promote HIF-transcriptional activity. The  
8 host inflammatory mediators nuclear factor- $\kappa$ B (NF- $\kappa$ B) and tumor necrosis factor- $\alpha$  (TNF- $\alpha$ ) induce HIF-1 $\alpha$   
9 transcription<sup>21,22</sup>. Reactive oxygen species (ROS) produced by inflammatory cells provide a further mechanism for  
10 inflammation-driven HIF-signalling<sup>23-25</sup>. Several viruses induce the HIF signaling pathway including hepatitis C virus<sup>26-</sup>  
11 <sup>28</sup>, human papillomavirus<sup>29</sup>, Kaposi sarcoma-associated herpesvirus<sup>30</sup> and human cytomegalovirus<sup>31</sup>. Several reports  
12 have suggested that HBx can interact with and stabilize HIFs<sup>32-40</sup>, however, this proposed HBx-HIF interplay awaits  
13 validation in HBV replication *in vitro* and *in vivo* model systems.

14  
15 In this study, we report a significant upregulation of hypoxic gene expression in a cohort of chronic HBV infected  
16 patients<sup>41</sup>. However, our studies to investigate the underlying mechanism using state-of-the-art *in vitro* and *in vivo*  
17 HBV transgenic mice and human liver chimeric mice models show limited evidence of hypoxic gene expression. These  
18 studies highlight a major role of liver inflammation and a complex interplay between HBV and HIF signalling in the  
19 chronic infected liver that is not recapitulated by current infection-competent model systems. Collectively, our data  
20 show clear evidence of hypoxia-driven gene expression in CHB in the absence of cirrhosis or HCC development that  
21 may play a role in driving hepatocarcinogenesis.

22

## 23 RESULTS

24

### 25 Increased hypoxia gene signature in chronic hepatitis B.

26 To determine whether there is any evidence of hypoxic associated transcription in CHB we used a published RNA-seq  
27 transcriptome of hypoxic HepG2 cells<sup>42</sup> (cultured at 0.5% oxygen for 16 hours) to identify 80 genes with a greater than  
28 2-fold increase in transcript levels (false discovery rate (FDR) of < 0.05) (**Supplementary Table 1**). We assessed the  
29 expression profile of these hypoxic regulated genes using a published liver transcriptome (Affymetrix-microarray) data  
30 set obtained from a cohort of chronic HBV infected patients (CHB, n=90) that were free of cirrhosis or HCC and  
31 uninfected control subjects (n=6 healthy)<sup>41</sup>. We excluded any patients that had no detectable serum HBV DNA. We  
32 noted an increase in HIF-1 $\alpha$  mRNA levels in the CHB patients compared to control subjects (Log<sub>2</sub> FC = 2.648, p=0.005).  
33 Gene set enrichment analysis (GSEA) showed a significant enrichment in the hypoxia gene set in the infected patients  
34 (**Fig.1a**). To extend this observation we used GSEA to screen the CHB cohort for expression of 67 HIF and hypoxia  
35 signatures obtained from the Molecular Signatures Database (MSigDB v 7.0, [https://www.gsea-](https://www.gsea-msigdb.org/gsea/msigdb/)  
36 [msigdb.org/gsea/msigdb/](https://www.gsea-msigdb.org/gsea/msigdb/)). We observed an enrichment of over 50% of these gene sets in CHB cohort (FDR<0.25),

1 confirming increased expression of hypoxic genes in CHB liver (**Fig.1b**). To evaluate other enriched pathways in CHB  
2 liver, GSEA was carried out using the Hallmark gene sets from MSigDB. This data base is curated to have minimal  
3 overlap between categories, reducing noise and redundancy and summarize specific cell states or biological  
4 processes. This analysis identified genes associated with allograft rejection as the most significantly upregulated gene  
5 set in CHB. Interestingly HIF-1 $\alpha$  was one of the leading-edge genes in this subset; contributing significantly to the core  
6 enrichment score. Moreover, we noted a significant increase in inflammatory signaling pathways in CHB liver: ‘TNFA  
7 signaling via NF-kB’, ‘Inflammatory Response’ and ‘Interferon Gamma Response’ (**Fig.1c**). In summary, these data  
8 show increased hypoxic gene signatures in CHB liver that associates with an activation of inflammatory pathways.

9

#### 10 **Limited evidence for HBx to stabilise HIF-1 $\alpha$ or HIF-2 $\alpha$ expression or associated transcriptional activity *in vitro*.**

11 As HBx is the major viral encoded transcriptional activator we wanted to assess its role in stabilizing HIFs and used the  
12 bipotent HepaRG cell line engineered to express HBx (HepaRG-HBx<sub>WT</sub>) under a tetracycline (Tet) inducible  
13 promoter<sup>43,44</sup> and confirmed HBx expression (**Fig.2a**). HBx in this model system is functionally active and can restore  
14 the replication of mutant viruses lacking HBx<sup>44</sup>. HBx promotes viral transcription by degrading the host structural  
15 maintenance of chromosomes (Smc) complex Smc5/6<sup>45</sup> and we confirmed the loss of Smc6 expression in Tet-induced  
16 HepaRG-HBx<sub>WT</sub> cells (**Fig.2a**). As a control for these experiments we generated HepaRG cells encoding HBx with three  
17 nonsense mutations (HepaRG-HBx<sub>STOP</sub>). To assess whether HBx can promote or stabilize HIF expression we treated  
18 HepaRG-HBx<sub>WT</sub> or HepaRG-HBx<sub>STOP</sub> cells with Tet and cultured at 1% oxygen, a typical oxygen concentration used to  
19 model hypoxia *ex vivo*, or standard ‘normoxic’ laboratory conditions of 20% oxygen for 24h. HBx had minimal impact  
20 on HIF-1 $\alpha$  or HIF-2 $\alpha$  protein (**Fig.2b**) or mRNA levels (**Fig.2c**) in HepaRG cells cultured at 20% oxygen. Culturing  
21 HepaRG-HBx<sub>WT</sub> or HepaRG-HBx<sub>STOP</sub> cells under 1% oxygen confirmed HIF-1 $\alpha$  or HIF-2 $\alpha$  expression and importantly  
22 showed a negligible effect of HBx on either HIF isoform (**Fig.2b**). To assess whether HBx altered HIF transcriptional  
23 activity we quantified the mRNA levels of four HIF-regulated host genes (*CAIX*, *BNIP3*, *VEGFA* or *GLUT1*) (**Fig.2c**) and  
24 CAIX protein expression (**Fig.2b**) and observed no differences. Under normoxic conditions HIFs are hydroxylated by  
25 the oxygen-dependent PHDs and targeted for proteosomal degradation. Oxygen reperfusion of hypoxic cells results  
26 in a time-dependent loss of HIFs and we assessed whether the presence of HBx could alter the kinetics of HIF  
27 expression. A comparable decrease in HIF-1 $\alpha$  and HIF-2 $\alpha$  proteins was seen after 10-20 mins of oxygen reperfusion in  
28 both Tet treated and untreated cells (**Fig.2d**), demonstrating that HBx has a negligible effect on the kinetics of HIF  
29 degradation. In summary, we demonstrate that HepaRG cells are responsive to low oxygen and show a significant  
30 increase in hypoxia-associated gene transcription, this effect was not impacted by the co-expression of HBx.

31 To further investigate a role for HBx to stabilize HIF-1 $\alpha$  we used an adenoviral vector engineered to express HBx (Ad-  
32 HBx) and confirmed HBx expression and Smc6 degradation. Additionally, transduction of HepG2-NTCP cells with Ad-  
33 HBx restored the replication of an HBV virus with a mutated HBx open reading frame (HBV<sub>x</sub>) further demonstrating  
34 its functional activity (**Fig.3a**). HepG2-NTCP cells transduced with Ad-HBx or Ad-OVA (adenoviral vector expressing  
35 ovalbumin) were cultured at 20% or 1% oxygen and cells harvested over a 48h period. We confirmed HBx expression

1 24h post-transduction (**Fig.3b**) and observed expression of HIF-1 $\alpha$  after 8h at 1% O<sub>2</sub>. Comparable expression levels of  
2 HIF-1 $\alpha$  were noted in both Ad-HBx and Ad-OVA transduced cells, demonstrating a negligible effect of HBx on HIF-1 $\alpha$   
3 induction. These results further highlight a minimal role of HBx in regulating HIF1 $\alpha$  or HIF2 $\alpha$  mRNA or protein  
4 expression.

#### 5 **Studying HIF transcriptional activity in HBV transgenic mice.**

6 Since HBV can only infect humans and hominoid primates, no immune competent animal models are available that  
7 support natural HBV infection. One of the most-widely used murine models for studying CHB are transgenic mice  
8 expressing HBV from a single integrated genome (HBVtg). HBVtg mice have been reported to develop HCC that show  
9 similar chromosomal aberrations and gene expression patterns to human HBV-associated HCC<sup>46</sup>. To study the effect  
10 of HBV on HIF transcriptional activity in this model system, HBVtg mice were treated with lipid nanoparticle  
11 complexed, liver-targeted siRNAs designed to silence all HBV transcripts (siHBV)<sup>47</sup> or with an unspecific control siRNA  
12 (siCtrl). The HBV-specific siRNA led to effective HBV silencing with greater than 95% reduction in HBeAg in the serum  
13 (**Fig.4a**) and viral transcripts in the liver (**Fig.4b**). However, silencing HBV mRNAs and antigens had no impact on HIF  
14 regulated gene transcripts (*CAIX*, *VEGFA*, *GLUT1* and *PHD2*) (**Fig.4c**). These studies suggest a minimal role of HBV  
15 encoded proteins or RNAs in promoting HIF transcriptional activity.

16

#### 17 **Studying HIF transcriptional activity in HBV infected hepatocytes and human liver chimeric mice.**

18 To complement the HBx studies described above we investigated the effect of HBV infection on HIF oxygen sensing  
19 pathways in current state-of-the-art *in vitro* and *in vivo* models. HepG2-NTCP cells were infected with HBV and  
20 cultured under normoxic conditions and sampled after 3 and 9 days to assess HIF-1 $\alpha$  or HIF-2 $\alpha$  expression. HBV gene  
21 expression was confirmed by measuring HBeAg (53.96  $\pm$  2.7 IU/mL) and HBsAg (12.63  $\pm$  4.4 IU/mL), however, we failed  
22 to detect either HIF or CAIX expression in the infected or non-infected cells (**Fig.5a**). As a control we treated HepG2-  
23 NTCP cells with a HIF PHD inhibitor (FG4592 at 30  $\mu$ M) and demonstrated HIF protein expression (**Fig.5a**). Analyzing a  
24 published transcriptomic RNA-seq data from HBV infected primary human hepatocytes<sup>48</sup> showed no evidence of  
25 hypoxic gene upregulation (**Fig.5b**). To further validate our conclusions we used the chimeric human liver FNRG mouse  
26 model<sup>49</sup> to assess whether HBV infection would induce HIF signaling in this model. Female FNRG mice<sup>49</sup> between 8-  
27 12 weeks of age were transplanted with 0.5 $\times$ 10<sup>6</sup> cryopreserved adult human hepatocytes by intrasplenic injection and  
28 monitored for engraftment by measuring human albumin levels in the serum (at least 0.1mg human albumin per mL  
29 in peripheral blood). Engrafted animals were infected with 0.5 million genome equivalent (GE) copies of HBV per  
30 mouse and were monitored for HBV replication. Once stable viremia was established (minimum 5 $\times$ 10<sup>7</sup> GE mL<sup>-1</sup> of  
31 serum) the mice were sacrificed and livers harvested from HBV infected (n=4) and uninfected (n=3) animals for RNA  
32 isolation and RNA-sequencing. Analysing these RNA-seq data sets showed minimal evidence for an increase in hypoxic  
33 transcriptional activity in the HBV infected livers (**Fig.5b**). For comparative purposes, we show that hypoxic genes were  
34 upregulated in the CHB cohort<sup>41</sup> (**Fig.5b**), demonstrating the influence of inflammation on gene regulation and  
35 highlighting the limitations of current HBV replication models to model CHB.

## 1 DISCUSSION

2 In this study we identified increased hypoxia gene signatures in a CHB cohort in the absence of cirrhosis or HCC. We  
3 noted an increase in HIF-1 $\alpha$  mRNA levels, consistent with their transcriptional regulation by inflammatory mediators  
4 such as TNF $\alpha$ . Given previous reports that HBx can stabilize HIFs<sup>32-40,50</sup>, we investigated whether functionally active  
5 HBx could regulate endogenous HIF-1 $\alpha$  and HIF-2 $\alpha$  mRNA, protein and transcriptional activity *in vitro*. We found  
6 minimal evidence for HBx regulation of HIFs in three independent model systems: an inducible HepaRG-HBx cell line;  
7 an Ad-HBx transduced cell, and in *de novo* infection of HepG2-NTCP or PHHs. To reconcile our observations with  
8 previous publications it is relevant to recognize the differences from earlier studies. Firstly, due to the technical  
9 difficulties in visualizing HBx by western blotting or immunofluorescent imaging, many of the earlier studies did not  
10 confirm HBx expression. Secondly, the majority of studies did not validate the functional activity of the expressed HBx  
11 protein. Finally, several studies assessed HBx stabilization of HIF-1 $\alpha$  using transient plasmid transfection systems with  
12 hypoxia reporter constructs, rather than directly measuring HIF expression and HIF target gene modulation. Given our  
13 current knowledge that HBx degrades Smc6 that silences episomal DNA transcription, the interpretation of these  
14 earlier plasmid based systems<sup>51</sup> is now uncertain. Since we have directly confirmed expression and function of HBx in  
15 our *in vitro* models and quantified endogenous HIF transcriptional activity under normoxic or hypoxic conditions we  
16 are confident that HBx does not modulate HIF expression or transcriptional activity in the model systems used.

17  
18 Guerrieri et al. 2017 identified and validated a role for HBx in regulating genes involved in endocytosis, predominantly  
19 members of the Ras-related in brain (Rab) family<sup>9</sup>. Anti-HBx chromatin immunoprecipitation studies identified HBx  
20 binding sites that included RAB1A, RAB2B and RAB5B promoters and none of the validated Rab genes were listed in  
21 our hypoxic gene set ([Supplementary Fig.1](#)). Furthermore, GSEA of the CHB cohort or screening reactome gene sets  
22 showed only a modest enrichment in the 'Transferrin Endocytosis' pathway ([Fig.1c](#)), suggesting a minimal overlap  
23 between HBx and HIF regulated genes.

24  
25 Our results support a model where HBV infection associated inflammatory responses promote HIF expression and  
26 these complex virus-cell interactions are not recapitulated by simple *in vitro* culture systems, HBV transgenic mice or  
27 immunodeficient SCID human liver chimeric mouse models. Our bio-informatic analysis identified 25 hypoxia  
28 upregulated genes in chronic HBV infected patients, including *LOXL2*, *SMIM3*, *TNS1*, and *IGFBP1*. Notably, *LOXL2*  
29 overexpression in HCC was previously associated with high tumour grade, metastasis, and poor patient overall and  
30 disease-free survival<sup>52</sup>. *LOXL2* was shown to mediate its pathogenic effects in HCC angiogenesis via vasculogenic  
31 mimicry signalling, cytoskeleton reorganization, and bone-marrow derived cell recruitment<sup>52,53</sup>. In fact, hypoxia and  
32 HIF-1 $\alpha$  signalling have been identified as key regulators of *LOXL2* and driver of its pathogenesis, consistent with our  
33 observations<sup>53,54</sup>. Another significantly upregulated gene in chronic HBV patients, *IGFBP1*, was recently reported to  
34 be a HIF-2 $\alpha$  regulated gene *in vitro* and *in vivo* model systems<sup>55</sup>. Furthermore, *IGFBP1* is a known NF $\kappa$ B target gene  
35 and is induced by HBV infection<sup>56</sup>. These data suggest co-regulation of *IGFBP1* by inflammatory pathways including

1 NFkB and oxygen sensing mechanisms such as HIF signalling, which is consistent with our observation of inflammatory  
2 gene enrichment associating with hypoxia gene signature in CHB.

3

4 Our observation of increased hypoxic gene signature expression in CHB patients offers an important insight on HBV  
5 disease stage stratification and suggest areas for bio-marker discovery for early HCC detection. This is in agreement  
6 with previous studies that have associated higher HIF $\alpha$  mRNA and protein expression in HCC with worse prognostic  
7 outcomes for HCC patients<sup>18-20</sup>. Moreover, as the liver is a naturally physiologically low oxygen environment, future  
8 investigations exploring how oxygen sensing pathways regulate HBV replication and pathogenesis may identify novel  
9 therapeutic targets

10

## 11 MATERIALS AND METHODS

12

13 **Cell lines and reagents.** HepaRG cells expressing HBx under the control of a Tetracycline inducible promoter were  
14 cultured in Williams E medium supplemented with 10% FBS, 50 U penicillin/streptomycin mL<sup>-1</sup>, 5  $\mu$ g human insulin  
15 mL<sup>-1</sup> and 5 $\times$ 10<sup>-7</sup> M hydrocortisone hemisuccinate (Sigma). As a control we generated HepaRG cells expressing an  
16 inactive HBx null mutant (HepaRG-HBx<sub>STOP</sub>) where three point nonsense mutations (relative to EcoRI site: C to A,  
17 1393nt; C to A, 1396nt and C to T, 1397nt) were introduced to generate three stop codons (respectively, TGA, 1393nt;  
18 TGA, 1396nt; TAA, 1397nt) in HBV genotype D. HepG2-NTCP cells<sup>57</sup> were maintained in Dulbecco's Modified Eagles  
19 Medium (DMEM) supplemented with 10% fetal bovine serum (FBS), 2 mM L-glutamine, 1 mM Sodium Pyruvate, 50  
20 IU penicillin/streptomycin mL<sup>-1</sup> and non-essential amino acids (Life Technologies, UK). Antibodies specific for HIF-1 $\alpha$   
21 were purchased from BD Biosciences (610959), anti-HIF-2 $\alpha$  was purchased from Novus (NB100-132), and anti-CAIX  
22 was provided by the Harris laboratory (University of Oxford). HIF PHD inhibitor FG4592 was purchased from  
23 Cambridge Biosciences, UK. Cells were incubated under hypoxia in an atmosphere-regulated chamber with 1% O<sub>2</sub>: 5%  
24 CO<sub>2</sub>: balance N<sub>2</sub> (Invivo 400, Baker-Ruskin Technologies). The Ad-HBx and Ad-Ova express the HBV genotype D HBx  
25 gene and chicken ovalbumin gene under control of the Transthyretin (TTR) promoter. Promoter and insert were  
26 inserted into the E1 region of adenovirus (Ad5 $\Delta$ E1/E3) backbone plasmid pAd/PL-DEST through Gateway  
27 recombination following the manufacturer's instructions (Gateway System; Invitrogen, Karlsruhe, Germany). Adeno  
28 virus stocks were titrated using the cytopathic effect in HepG2 cells as previously described<sup>58</sup>.

29

30 **HBV genesis and infection.** HBV was purified from a HepAD38 producer line as previously reported<sup>57</sup>. Briefly, virus was  
31 purified using centrifugal filter devices (Centricon Plus-70 and Biomax 100.000, Millipore Corp., Bedford, MA) and  
32 stocks with a titre between 3 $\times$ 10<sup>9</sup> and 3 $\times$ 10<sup>10</sup> viral genome equivalents (vge) per mL stored at -80°C. HBV-X- virus was  
33 purified from a HepG2 based cell line containing a HBV 1.3x overlength integrated viral genome where both 5' and 3'  
34 HBx genes were knocked out by a point mutation that changes the eight amino acid to a stop codon (CAA-to-TAA) as  
35 previously described<sup>44</sup>. HepG2-NTCP cells were treated with 2.5% dimethyl sulphoxide (DMSO) for 3 days and  
36 inoculated with HBV at an MOI of 200 in the presence of 4% polyethylene glycol 8000. After 18-20h the inoculum was

1 removed by washing with PBS and the cells cultured in the presence of 2.5% DMSO. Secreted HBe and HBs antigen  
2 were quantified by ELISA (Autobio, China).

3

4 **PCR quantification of HBV RNA and HIF gene transcripts.** Total cellular RNA was extracted using an RNeasy mini kit  
5 (Qiagen) following the manufacturer's instructions and samples treated with RNase-Free DNaseI (14 Kunitz units/rxn,  
6 Qiagen) for 30 minutes at room temperature. RNA concentration was measured by NanoDrop 1000  
7 spectrophotometer (Thermo Scientific) and cDNA synthesized with 0.25-1µg of RNA in a 20µL total reaction volume  
8 using a random hexamer/oligo dT strand synthesis kit in accordance with the manufacturer's instructions (10 minutes  
9 at 25°C; 15 minutes at 42°C; 15 minutes at 48°C; SensiFast, Bioline). PCR amplification of HBV RNAs were performed  
10 using primers as previously described<sup>43</sup> using a SYBR green real-time PCR protocol (qPCR BIO SyGreen, PCR Biosystems)  
11 in a Lightcycler 96™ instrument (Roche). The amplification conditions were: 95°C for 2 minutes (enzyme activation),  
12 followed by 45 cycles of amplification (95°C for 5 seconds; 60°C for 30 seconds). HIF target genes were amplified using  
13 TaqMan® Gene Expression assays (CAIX [Hs00154208\_m1]; VEGFA [Hs00900055\_m1]; BNIP3 [Hs00969291\_m1] and  
14 GLUT1 [Hs00892681\_m1]) (Thermo Fisher) and amplified using a Taqman real-time PCR protocol (qPCR BIO  
15 probe, PCR Biosystems) using the same conditions as listed above.

16

17 **HBV transgenic mice and siRNA delivery.** Animal experiments were conducted in accordance with the German  
18 regulations of the Society for Laboratory Animal Science (GV-SOLAS) and the European Health Law of the Federation  
19 of Laboratory Animal Science Associations (FELASA). Experiments were approved by the local Animal Care and Use  
20 Committee of Upper Bavaria and followed the 3R rules. Mice were kept in a specific-pathogen-free facility under  
21 appropriate biosafety level following institutional guidelines. HBVtg mice (strain HBV1.3.32)<sup>59,60</sup> carrying a 1.3-fold  
22 overlength HBV genome (genotype D) on a C57BL/6J background and both male and female mice between 12-15  
23 weeks were used. The HBV specific siRNA (siHBV) was designed to silence all HBV transcripts by targeting the 3' region  
24 of the HBV genome and the control siRNA (siCtrl) does not target any viral or known host transcripts. siRNAs were  
25 complexed with InvivoFectamine 3.0 reagent (ThermoFisher Scientific) before injecting 1 µg/g body weight into the  
26 tail vein. HBeAg was quantified from mouse sera after dilution with the Architect HBsAg Manual Diluent using the  
27 quantitative HBeAg Reagent Kit (Ref: 6C32-27) with HBeAg Quantitative Calibrators (Ref.: 7P24-01) on an Architect  
28 TM platform (Abbott Laboratories, Wiesbaden, Germany). Immediately after sacrificing the mice and preparation of  
29 the liver, an approximately 0.4 mm thick and 1-1.5 cm long piece of liver was placed in 500µL RNAlater. After storage  
30 for 24h at 4°C (to allow RNA later to penetrate tissue) the tissue was transferred to -20°C and stored until RNA  
31 preparation. RNA was prepared using the RNeasy Mini kit (Qiagen), where an approximate 20mg piece of frozen liver  
32 was placed in a 2 mL micro-centrifuge tube pre-cooled on dry ice. After adding 600µL of Buffer RLT, tissue was  
33 homogenized using the TissueLyser LT (Qiagen) for 5 min at 50 Hz. Total RNA was extracted following the protocol of  
34 the RNeasy mini kit.

35



1 **HBV infected human chimeric mice and RNA-sequencing.** Mock and HBV infected mice were sacrificed and livers  
2 harvested for RNA isolation and RNA-sequencing at the Beijing Genomics Institute (BGI, Hong Kong). RNA purity was  
3 assessed with a NanoDrop 2000 spectrophotometer (Thermo Fisher Scientific) and integrity determined using a 2100  
4 Bioanalyzer Instrument (Agilent Technologies). Sequencing was performed on a BGISEQ-500 (Beijing Genomics  
5 Institute, Hong Kong) employing the PE100 mode to produce raw paired-end reads of 100 bp and SOAPnuke (v1.5.2)  
6 software to filter out non-human sequencing reads, as previously reported<sup>50,61,62</sup>. Clean reads (FASTQ files) were  
7 uploaded to Partek Flow (version 8.0, build 8.0.19.1125; Partek Inc., St. Louis, MO, USA), quality-controlled, and  
8 aligned to the human genome (hg38) with STAR - 2.6.1d aligner software. Genes were quantified using the transcript  
9 model Ensembl Transcripts release 91 and differential expression determined with DESeq2 (3.5). Microarray analysis  
10 was performed with Partek Genomics Suite (v6.6) as previously described<sup>63</sup>. Scatter dot plots of fold change values  
11 were plotted with Graphpad Prism version 8. RNA-seq data are deposited in the GEO archive at NCBI, with the  
12 accession number SE145835 and entitled: Transcriptional profiling of hepatocytes isolated from chronically HBV-  
13 infected human liver chimeric mice.

14

15 **Bioinformatic analyses.** To determine whether HBV infection induces hypoxia-responsive genes, we interrogated the  
16 mRNA expression patterns of the liver chimeric mice RNA-Seq dataset for i) the top 80 hypoxia-induced genes as  
17 identified in HepG2 hepatic cells<sup>42</sup>. In-house datasets were compared with RNA-seq<sup>48</sup> from HBV-infected primary  
18 human hepatocytes. Data were retrieved from GEO (accessions: GSE120886, GSE93153, GSE118295). For consistency,  
19 all datasets were re-analysed with the same Partek Flow bioinformatic pipeline. Microarray analysis was performed  
20 with Partek Genomics Suite (v6.6) as previously described<sup>63</sup> and data presented using Graphpad Prism 8.

21

22 **Statistical Analyses:** All analyses were performed using Prism 8 (GraphPad, La Jolla, CA). Data are shown as means  $\pm$   
23 SD, probabilities are indicated by \* =  $p < 0.05$ , \*\* =  $p < 0.01$ , \*\*\* =  $p < 0.001$  or \*\*\*\* =  $p < 0.0001$ , with Bonferroni  
24 corrections for multiple testing when appropriate.

25

## 26 REFERENCES

- 27 1 Sugarman, J. *et al.* Ethics and hepatitis B cure research. *Gut* **66**, 389-392, doi:10.1136/gutjnl-2016-313009  
28 (2017).
- 29 2 Organization, W. H. Global hepatitis report 2017. (2017).
- 30 3 Nassal, M. HBV cccDNA: viral persistence reservoir and key obstacle for a cure of chronic hepatitis B. *Gut* **64**,  
31 1972-1984, doi:10.1136/gutjnl-2015-309809 (2015).
- 32 4 Grossi, G., Vigano, M., Loglio, A. & Lampertico, P. Hepatitis B virus long-term impact of antiviral therapy  
33 nucleot(s)ide analogues (NUCs). *Liver Int* **37 Suppl 1**, 45-51, doi:10.1111/liv.13291 (2017).
- 34 5 Bray, F. *et al.* Global cancer statistics 2018: GLOBOCAN estimates of incidence and mortality worldwide for  
35 36 cancers in 185 countries. *CA Cancer J Clin* **68**, 394-424, doi:10.3322/caac.21492 (2018).
- 36 6 European Association for the Study of the Liver. Electronic address, e. e. e. & European Association for the  
37 Study of the, L. EASL Clinical Practice Guidelines: Management of hepatocellular carcinoma. *J Hepatol* **69**,  
38 182-236, doi:10.1016/j.jhep.2018.03.019 (2018).
- 39 7 Ringelhan, M., McKeating, J. A. & Protzer, U. Viral hepatitis and liver cancer. *Philos Trans R Soc Lond B Biol Sci*  
40 **372**, doi:10.1098/rstb.2016.0274 (2017).

- 1 8 Levrero, M. & Zucman-Rossi, J. Mechanisms of HBV-induced hepatocellular carcinoma. *J Hepatol* **64**, S84-S101, doi:10.1016/j.jhep.2016.02.021 (2016).
- 2
- 3 9 Guerrieri, F. *et al.* Genome-wide identification of direct HBx genomic targets. *BMC Genomics* **18**, 184, doi:10.1186/s12864-017-3561-5 (2017).
- 4
- 5 10 Rappaport, A. M. The structural and functional unit in the human liver (liver acinus). *Anat Rec* **130**, 673-689, doi:10.1002/ar.1091300405 (1958).
- 6
- 7 11 Braeuning, A. *et al.* Differential gene expression in periportal and perivenous mouse hepatocytes. *FEBS J* **273**, 5051-5061, doi:10.1111/j.1742-4658.2006.05503.x (2006).
- 8
- 9 12 Jungermann, K. & Kietzmann, T. Zonation of parenchymal and nonparenchymal metabolism in liver. *Annu Rev Nutr* **16**, 179-203, doi:10.1146/annurev.nu.16.070196.001143 (1996).
- 10
- 11 13 Halpern, K. B. *et al.* Single-cell spatial reconstruction reveals global division of labour in the mammalian liver. *Nature* **542**, 352-356, doi:10.1038/nature21065 (2017).
- 12
- 13 14 Wilson, G. K., Tennant, D. A. & McKeating, J. A. Hypoxia inducible factors in liver disease and hepatocellular carcinoma: current understanding and future directions. *J Hepatol* **61**, 1397-1406, doi:10.1016/j.jhep.2014.08.025 (2014).
- 14
- 15 15 Pugh, C. W. & Ratcliffe, P. J. New horizons in hypoxia signaling pathways. *Exp Cell Res* **356**, 116-121, doi:10.1016/j.yexcr.2017.03.008 (2017).
- 16
- 17 16 Ratcliffe, P. J. Oxygen sensing and hypoxia signalling pathways in animals: the implications of physiology for cancer. *The Journal of physiology* **591**, 2027-2042, doi:10.1113/jphysiol.2013.251470 (2013).
- 18
- 19 17 Scholz, C. C. & Taylor, C. T. Targeting the HIF pathway in inflammation and immunity. *Current opinion in pharmacology* **13**, 646-653, doi:10.1016/j.coph.2013.04.009 (2013).
- 20
- 21 18 Dai, C. X. *et al.* Hypoxia-inducible factor-1 alpha, in association with inflammation, angiogenesis and MYC, is a critical prognostic factor in patients with HCC after surgery. *BMC Cancer* **9**, 418, doi:10.1186/1471-2407-9-418 (2009).
- 22
- 23 19 Xiang, Z. L. *et al.* Gene expression profiling of fixed tissues identified hypoxia-inducible factor-1alpha, VEGF, and matrix metalloproteinase-2 as biomarkers of lymph node metastasis in hepatocellular carcinoma. *Clin Cancer Res* **17**, 5463-5472, doi:10.1158/1078-0432.CCR-10-3096 (2011).
- 24
- 25 20 Zheng, S. S., Chen, X. H., Yin, X. & Zhang, B. H. Prognostic significance of HIF-1alpha expression in hepatocellular carcinoma: a meta-analysis. *PLoS One* **8**, e65753, doi:10.1371/journal.pone.0065753 (2013).
- 26
- 27 21 Rius, J. *et al.* NF-kappaB links innate immunity to the hypoxic response through transcriptional regulation of HIF-1alpha. *Nature* **453**, 807-811, doi:10.1038/nature06905 (2008).
- 28
- 29 22 Palazon, A., Goldrath, A. W., Nizet, V. & Johnson, R. S. HIF transcription factors, inflammation, and immunity. *Immunity* **41**, 518-528, doi:10.1016/j.immuni.2014.09.008 (2014).
- 30
- 31 23 Masson, N. *et al.* The FIH hydroxylase is a cellular peroxide sensor that modulates HIF transcriptional activity. *EMBO Rep* **13**, 251-257, doi:10.1038/embor.2012.9 (2012).
- 32
- 33 24 Bonello, S. *et al.* Reactive oxygen species activate the HIF-1alpha promoter via a functional NFkappaB site. *Arterioscler Thromb Vasc Biol* **27**, 755-761, doi:10.1161/01.ATV.0000258979.92828.bc (2007).
- 34
- 35 25 Garcia, M. A. *et al.* Activation of NF-kB pathway by virus infection requires Rb expression. *PLoS One* **4**, e6422, doi:10.1371/journal.pone.0006422 (2009).
- 36
- 37 26 Wilson, G. K. *et al.* A dual role for hypoxia inducible factor-1alpha in the hepatitis C virus lifecycle and hepatoma migration. *J Hepatol* **56**, 803-809, doi:10.1016/j.jhep.2011.11.018 (2012).
- 38
- 39 27 Ripoli, M. *et al.* Hepatitis C virus-linked mitochondrial dysfunction promotes hypoxia-inducible factor 1 alpha-mediated glycolytic adaptation. *J Virol* **84**, 647-660, doi:10.1128/JVI.00769-09 (2010).
- 40
- 41 28 Nasimuzzaman, M., Waris, G., Mikolon, D., Stupack, D. G. & Siddiqui, A. Hepatitis C virus stabilizes hypoxia-inducible factor 1alpha and stimulates the synthesis of vascular endothelial growth factor. *J Virol* **81**, 10249-10257, doi:10.1128/JVI.00763-07 (2007).
- 42
- 43 29 Nakamura, M. *et al.* Hypoxia-specific stabilization of HIF-1alpha by human papillomaviruses. *Virology* **387**, 442-448, doi:10.1016/j.virol.2009.02.036 (2009).
- 44
- 45 30 Shin, Y. C., Joo, C. H., Gack, M. U., Lee, H. R. & Jung, J. U. Kaposi's sarcoma-associated herpesvirus viral IFN regulatory factor 3 stabilizes hypoxia-inducible factor-1 alpha to induce vascular endothelial growth factor expression. *Cancer Res* **68**, 1751-1759, doi:10.1158/0008-5472.CAN-07-2766 (2008).
- 46
- 47 31 McFarlane, S., Nicholl, M. J., Sutherland, J. S. & Preston, C. M. Interaction of the human cytomegalovirus particle with the host cell induces hypoxia-inducible factor 1 alpha. *Virology* **414**, 83-90, doi:10.1016/j.virol.2011.03.005 (2011).
- 48
- 49
- 50
- 51
- 52
- 53
- 54

- 1 32 Yoo, Y. G. *et al.* Hepatitis B virus X protein enhances transcriptional activity of hypoxia-inducible factor-1alpha  
2 through activation of mitogen-activated protein kinase pathway. *J Biol Chem* **278**, 39076-39084,  
3 doi:10.1074/jbc.M305101200 (2003).
- 4 33 Moon, E. J. *et al.* Hepatitis B virus X protein induces angiogenesis by stabilizing hypoxia-inducible factor-  
5 1alpha. *FASEB J* **18**, 382-384, doi:10.1096/fj.03-0153fje (2004).
- 6 34 Yoo, Y. G., Cho, S., Park, S. & Lee, M. O. The carboxy-terminus of the hepatitis B virus X protein is necessary  
7 and sufficient for the activation of hypoxia-inducible factor-1alpha. *FEBS Lett* **577**, 121-126,  
8 doi:10.1016/j.febslet.2004.10.004 (2004).
- 9 35 Han, H. K., Han, C. Y., Cheon, E. P., Lee, J. & Kang, K. W. Role of hypoxia-inducible factor-alpha in hepatitis-B-  
10 virus X protein-mediated MDR1 activation. *Biochem Biophys Res Commun* **357**, 567-573,  
11 doi:10.1016/j.bbrc.2007.04.012 (2007).
- 12 36 Xie, H. *et al.* The expression of hypoxia-inducible factor-1alpha in hepatitis B virus-related hepatocellular  
13 carcinoma: correlation with patients' prognosis and hepatitis B virus X protein. *Dig Dis Sci* **53**, 3225-3233,  
14 doi:10.1007/s10620-008-0296-9 (2008).
- 15 37 Yoo, Y. G. *et al.* Hepatitis B virus X protein induces the expression of MTA1 and HDAC1, which enhances  
16 hypoxia signaling in hepatocellular carcinoma cells. *Oncogene* **27**, 3405-3413, doi:10.1038/sj.onc.1211000  
17 (2008).
- 18 38 Holotnakova, T. *et al.* Role of the HBx oncoprotein in carbonic anhydrase 9 induction. *J Med Virol* **82**, 32-40,  
19 doi:10.1002/jmv.21671 (2010).
- 20 39 Liu, L. P. *et al.* HBx mutants differentially affect the activation of hypoxia-inducible factor-1alpha in  
21 hepatocellular carcinoma. *Br J Cancer* **110**, 1066-1073, doi:10.1038/bjc.2013.787 (2014).
- 22 40 Zhu, M. *et al.* Hepatitis B virus X protein induces expression of alpha-fetoprotein and activates PI3K/mTOR  
23 signaling pathway in liver cells. *Oncotarget* **6**, 12196-12208, doi:10.18632/oncotarget.2906 (2015).
- 24 41 Zhou, W. *et al.* Predictive model for inflammation grades of chronic hepatitis B: Large-scale analysis of clinical  
25 parameters and gene expressions. *Liver Int* **37**, 1632-1641, doi:10.1111/liv.13427 (2017).
- 26 42 Smythies, J. A. *et al.* Inherent DNA-binding specificities of the HIF-1alpha and HIF-2alpha transcription factors  
27 in chromatin. *EMBO Rep* **20**, doi:10.15252/embr.201846401 (2019).
- 28 43 D'Arienzo, V. *et al.* A PCR assay to quantify patterns of HBV transcription. *J Gen Virol*,  
29 doi:10.1099/jgv.0.001373 (2019).
- 30 44 Lucifora, J. *et al.* Hepatitis B virus X protein is essential to initiate and maintain virus replication after infection.  
31 *J Hepatol* **55**, 996-1003, doi:10.1016/j.jhep.2011.02.015 (2011).
- 32 45 Decorsiere, A. *et al.* Hepatitis B virus X protein identifies the Smc5/6 complex as a host restriction factor.  
33 *Nature* **531**, 386-389, doi:10.1038/nature17170 (2016).
- 34 46 Ringelhan, M. & Protzer, U. Oncogenic potential of hepatitis B virus encoded proteins. *Current opinion in*  
35 *virology* **14**, 109-115, doi:10.1016/j.coviro.2015.08.015 (2015).
- 36 47 Michler, T. *et al.* Knockdown of Virus Antigen Expression Increases Therapeutic Vaccine Efficacy in High-titer  
37 HBV Carrier Mice. *Gastroenterology*, doi:10.1053/j.gastro.2020.01.032 (2020).
- 38 48 Niu, C. *et al.* The Smc5/6 Complex Restricts HBV when Localized to ND10 without Inducing an Innate Immune  
39 Response and Is Counteracted by the HBV X Protein Shortly after Infection. *PLoS One* **12**, e0169648,  
40 doi:10.1371/journal.pone.0169648 (2017).
- 41 49 Wilson, E. M. *et al.* Extensive double humanization of both liver and hematopoiesis in FRGN mice. *Stem Cell*  
42 *Res* **13**, 404-412, doi:10.1016/j.scr.2014.08.006 (2014).
- 43 50 Fehlmann, T. *et al.* cPAS-based sequencing on the BGISEQ-500 to explore small non-coding RNAs. *Clin*  
44 *Epigenetics* **8**, 123, doi:10.1186/s13148-016-0287-1 (2016).
- 45 51 van Breugel, P. C. *et al.* Hepatitis B virus X protein stimulates gene expression selectively from  
46 extrachromosomal DNA templates. *Hepatology* **56**, 2116-2124, doi:10.1002/hep.25928 (2012).
- 47 52 Shao, B. *et al.* LOXL2 promotes vasculogenic mimicry and tumour aggressiveness in hepatocellular carcinoma.  
48 *J Cell Mol Med* **23**, 1363-1374, doi:10.1111/jcmm.14039 (2019).
- 49 53 Wong, C. C. *et al.* Lysyl oxidase-like 2 is critical to tumor microenvironment and metastatic niche formation  
50 in hepatocellular carcinoma. *Hepatology* **60**, 1645-1658, doi:10.1002/hep.27320 (2014).
- 51 54 Wang, M. *et al.* HIF-1alpha promoted vasculogenic mimicry formation in hepatocellular carcinoma through  
52 LOXL2 up-regulation in hypoxic tumor microenvironment. *J Exp Clin Cancer Res* **36**, 60, doi:10.1186/s13046-  
53 017-0533-1 (2017).

- 1 55 Geis, T. *et al.* HIF-2alpha attenuates lymphangiogenesis by up-regulating IGFBP1 in hepatocellular carcinoma.  
2 *Biol Cell* **107**, 175-188, doi:10.1111/boc.201400079 (2015).
- 3 56 Wu, S. *et al.* Cooperative effects of hepatitis B virus and TNF may play important roles in the activation of  
4 metabolic pathways through the activation of NF-kappaB. *Int J Mol Med* **38**, 475-481,  
5 doi:10.3892/ijmm.2016.2643 (2016).
- 6 57 Ko, C. *et al.* Hepatitis B virus genome recycling and de novo secondary infection events maintain stable  
7 cccDNA levels. *J Hepatol* **69**, 1231-1241, doi:10.1016/j.jhep.2018.08.012 (2018).
- 8 58 Sprinzl, M. F., Oberwinkler, H., Schaller, H. & Protzer, U. Transfer of hepatitis B virus genome by adenovirus  
9 vectors into cultured cells and mice: crossing the species barrier. *J Virol* **75**, 5108-5118,  
10 doi:10.1128/JVI.75.11.5108-5118.2001 (2001).
- 11 59 Guidotti, L. G., Matzke, B., Schaller, H. & Chisari, F. V. High-level hepatitis B virus replication in transgenic  
12 mice. *J Virol* **69**, 6158-6169 (1995).
- 13 60 Michler, T. *et al.* Blocking sense-strand activity improves potency, safety and specificity of anti-hepatitis B  
14 virus short hairpin RNA. *EMBO Mol Med* **8**, 1082-1098, doi:10.15252/emmm.201506172 (2016).
- 15 61 Huang, J. *et al.* A reference human genome dataset of the BGISEQ-500 sequencer. *Gigascience* **6**, 1-9,  
16 doi:10.1093/gigascience/gix024 (2017).
- 17 62 Mak, S. S. T. *et al.* Comparative performance of the BGISEQ-500 vs Illumina HiSeq2500 sequencing platforms  
18 for palaeogenomic sequencing. *Gigascience* **6**, 1-13, doi:10.1093/gigascience/gix049 (2017).
- 19 63 Giotis, E. S. *et al.* Constitutively elevated levels of SOCS1 suppress innate responses in DF-1 immortalised  
20 chicken fibroblast cells. *Sci Rep* **7**, 17485, doi:10.1038/s41598-017-17730-2 (2017).
- 21

## 22 ACKNOWLEDGEMENTS

23 We thank Peter Ratcliffe (University of Oxford) for his support and advice throughout this project and Peter Balfe for  
24 critical reading of the manuscript. Research in the McKeating laboratory is funded by Wellcome Trust IA  
25 200838/Z/16/Z and MRC project grant MR/R022011/1. Collaborative research in the Protzer and McKeating  
26 laboratories was funded by EU Horizon 2020 program through the Hep-CAR consortium and the Institute for Advanced  
27 Study with the support of the Technische Universität München via the German Excellence Initiative and EU 7<sup>th</sup>  
28 Framework Programme under grant agreement number 291763. TM was supported by a clinical leave stipend by the  
29 Else-Kröner Forschungskolleg "Microbial triggers as cause for disease" of Klinikum rechts der Isar, Technische  
30 Universität München. Research in the Klenerman lab is funded by Wellcome grant WT 109965MA and NIHR senior  
31 Fellowship. Research in Dorner laboratory was funded by an ERC grant (ERC-StG-2015-637304) and Wellcome Trust  
32 New Investigator award (104771/Z/14/Z).

33

## 34 AUTHOR CONTRIBUTION STATEMENT

35 PJL designed and conducted experiments and co-wrote the manuscript; JMh designed and conducted experiments  
36 and co-wrote the manuscript; EM analysed data; VD conducted experiments; TM designed and conducted  
37 experiments and co-wrote the manuscript; PACW conducted experiments; AM analysed data; AM O-P conducted  
38 experiments; M vd K provided reagents, JW provided reagents; DD provided reagents; MD designed experiments; PK  
39 provided expertise; UP provided reagents; SG analyzed data and co-wrote the manuscript and JAM designed the study  
40 and co-wrote the manuscript.

41

## 42 ADDITIONAL INFORMATION

1 RNA-seq data from HBV infected mice are deposited in the GEO archive at NCBI, with the accession number SE145835  
2 and entitled: Transcriptional profiling of hepatocytes isolated from chronically HBV-infected human liver chimeric  
3 mice. Our in-house data was compared with RNA-seq<sup>48</sup> from HBV-infected primary human hepatocytes and data  
4 retrieved from GEO (accessions: GSE120886, GSE93153, GSE118295).

5

#### 6 **COMPETING INTERESTS**

7 None of the authors have any conflict of interest.

8

9

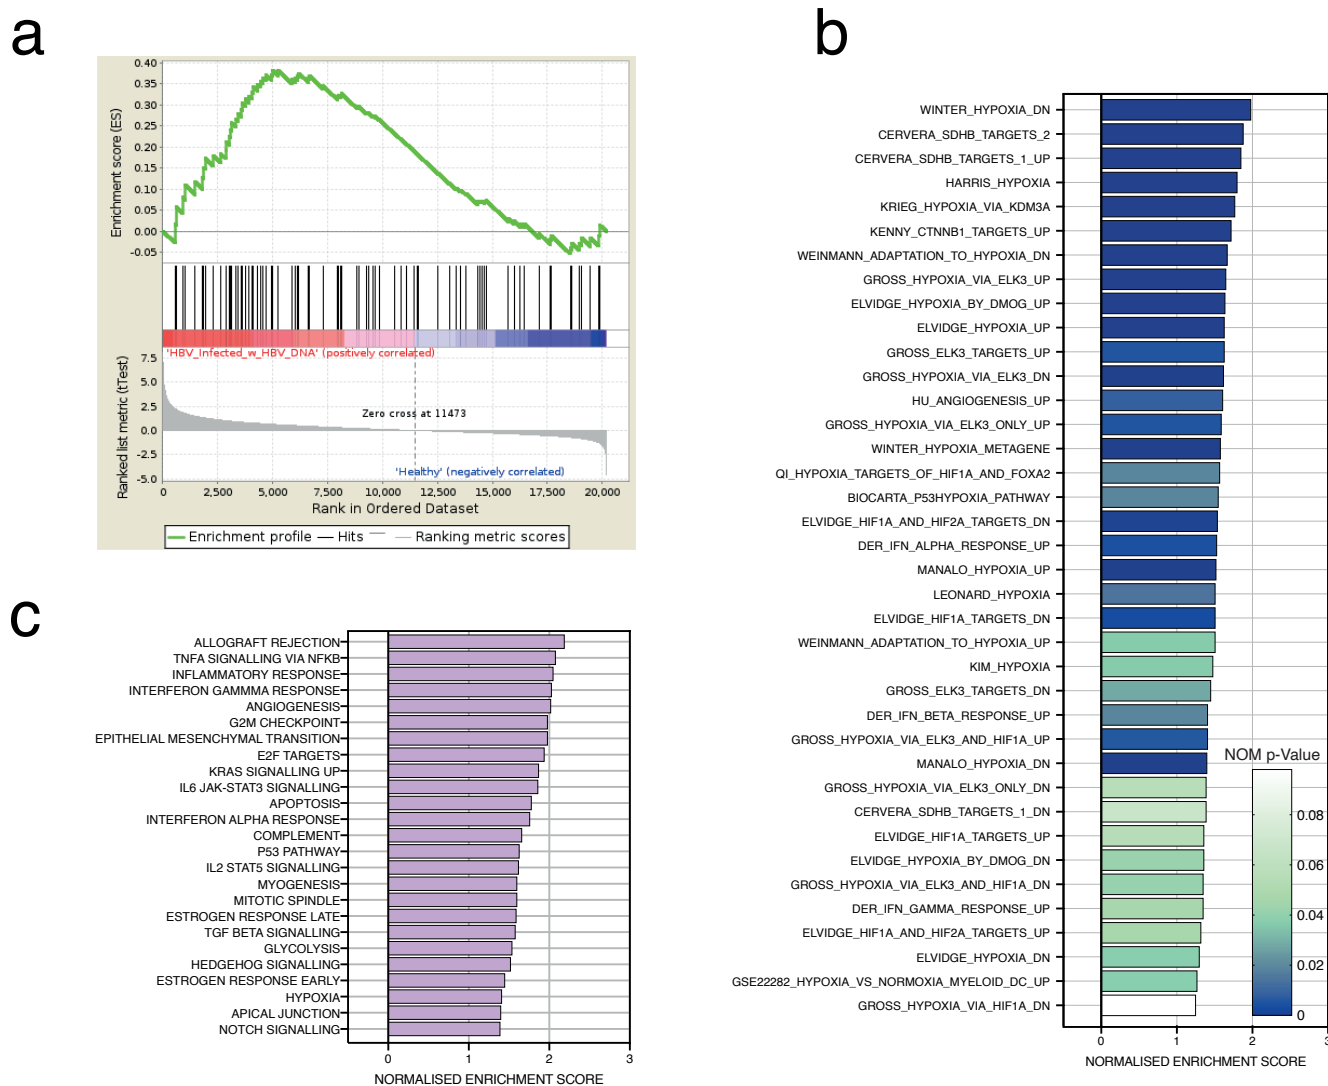

**Fig.1. Increased hypoxia gene expression in CHB.** GSEA shows a significant enrichment of HepG2 defined hypoxic genes<sup>42</sup> in chronic HBV infected patients<sup>41</sup> vs healthy patients (FDR = 0.06). The gene set was based on Fold Change > 2, and FDR < 0.05; 80 genes satisfied these criteria and are listed in supplementary Table 1 (a). HIF and hypoxia gene signatures from Molecular Signatures Database (MSigDB v 7.0, <https://www.gsea-msigdb.org/gsea/msigdb/>) were assessed in the CHB transcriptomic data set and 38 significantly upregulated genes identified (FDR<0.25) in CHB patient subsets ranked by Net Enrichment Score (NES) (b). Using the upregulated MSigDB hallmark gene sets, GSEA was used to identify the most upregulated pathways in the CHB cohort. 33 gene sets were significantly enriched (FDR<0.25). The image shows the top 25 most significantly enriched gene sets, ranked by NES (c).

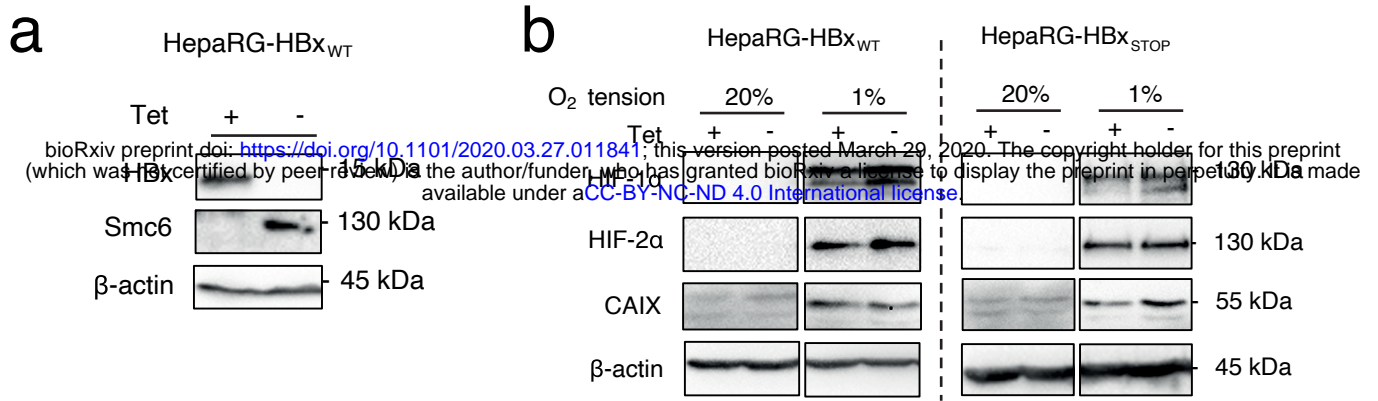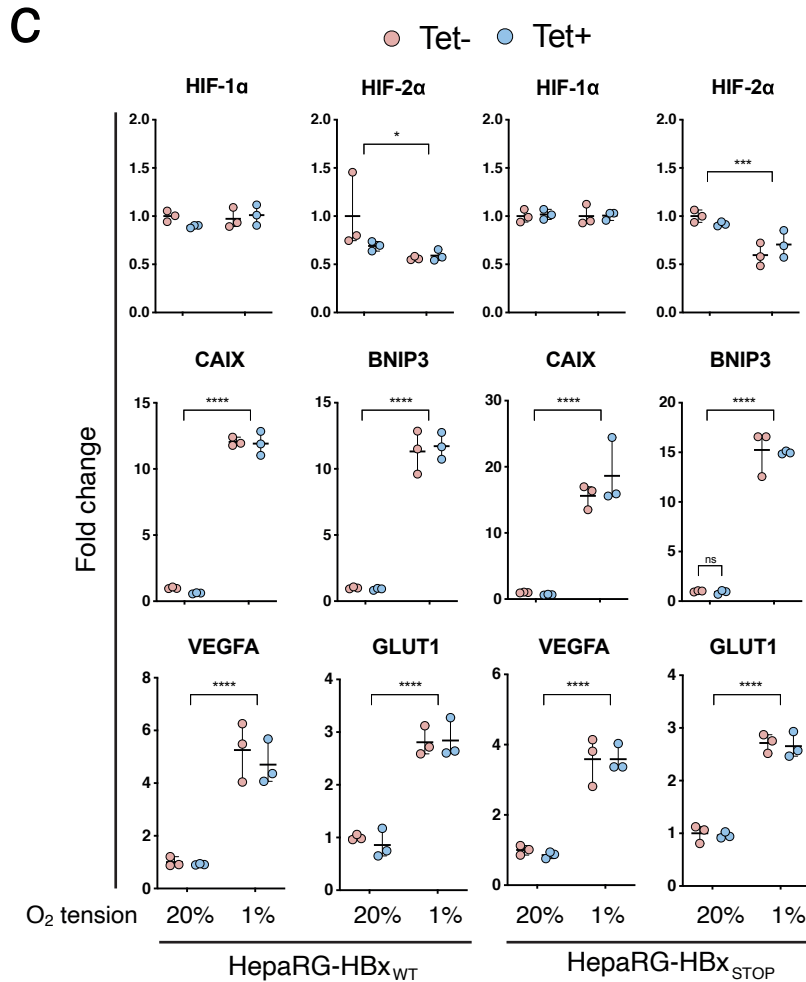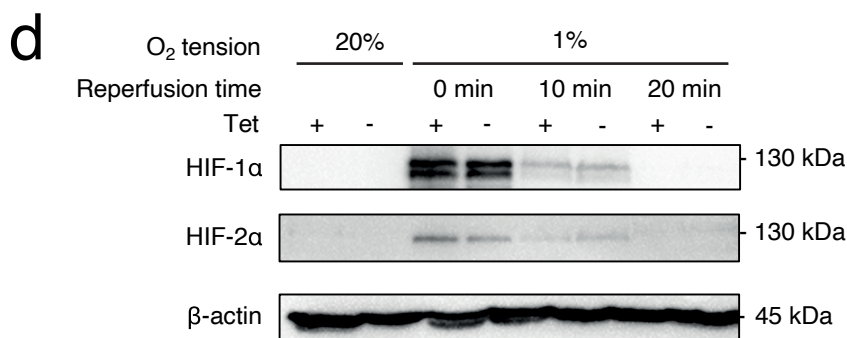

**Fig.2. Effect of HBx on HIF expression and transcriptional activity in HepaRG cells.** HepaRG cells encoding HBx were incubated with Tet (50  $\mu$ M) for 24 h and HBx protein and Smc6 expression detected by western blot (**a**). HepaRG cells encoding WT or mutated HBx (STOP) were incubated with or without Tet (50  $\mu$ M, 24 h) and cultured under 20% or 1% oxygen conditions for 24h. Cells were lysed and expression of HIF-1 $\alpha$ , HIF-2 $\alpha$ , Carbonic anhydrase IX (CAIX) and housekeeping gene B-actin assessed by western blotting (**b**) and mRNA levels of HIF-1 $\alpha$ , HIF-2 $\alpha$  and several HIF target genes (CAIX, BNIP3, VEGFA and GLUT1) quantified by qPCR (**c**). HepaRG cells encoding wild type HBx were incubated with Tet (50  $\mu$ M, 24 h) and cultured at 20% or 1% oxygen for 24h. The hypoxic cultures were returned to 20% oxygen. After 10 or 20 mins, cells were lysed and screened for HIF-1 $\alpha$  or HIF-2 $\alpha$  and housekeeping gene B-actin expression (**d**). The data is shown from a single experiment and is representative of three independent experiments and represents mean  $\pm$  standard deviation. Normality distribution was assessed by D'Agostino-Pearson test; 2-way-ANOVA with Bonferroni correction was applied with  $p < 0.05$  deemed as significant.

a

bioRxiv preprint doi: <https://doi.org/10.1101/2020.03.27.011841>; this version posted March 29, 2020. The copyright holder for this preprint (which was not certified by peer review) is the author/funder, who has granted bioRxiv a license to display the preprint in perpetuity. It is made available under aCC-BY-NC-ND 4.0 International license.

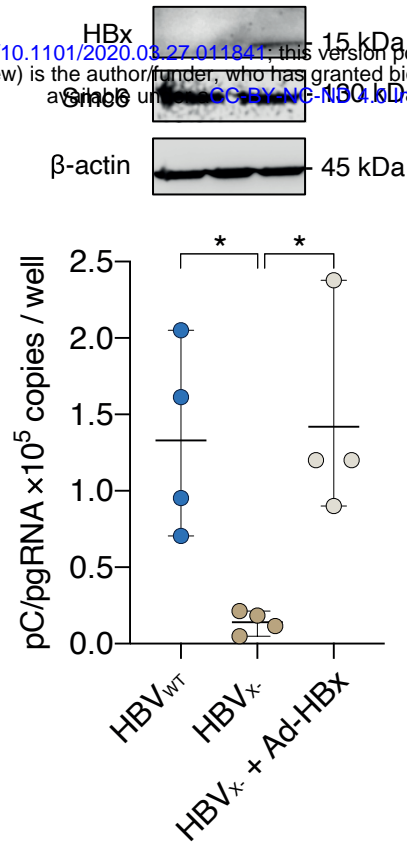

b

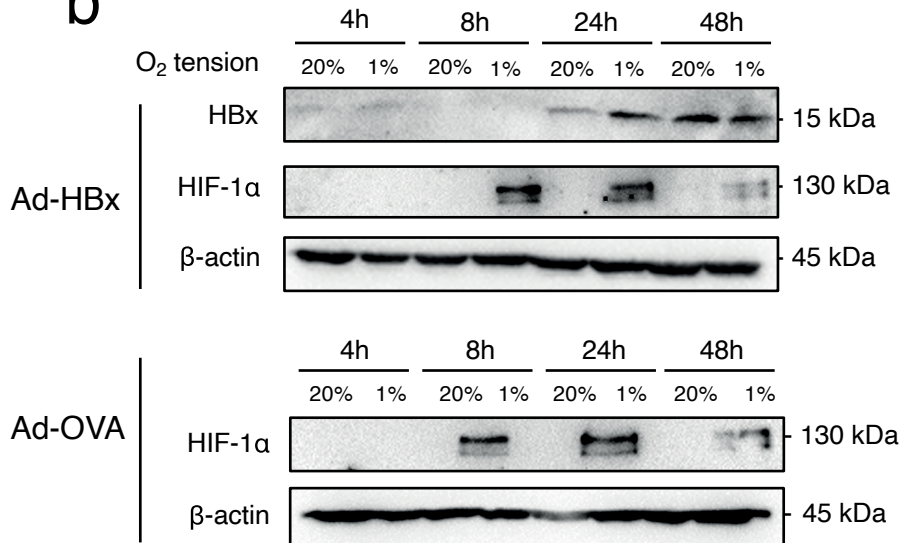

**Fig.3. Effect of HBx expression on HIF expression and transcriptional activity in HepG2 cells.**

HepG2-NTCP cells were transduced with Ad-HBx and 24h later the cells were probed for HBx and Smc6 expression. In parallel experiments HepG2-NTCP cells were infected with HBV or a mutated virus lacking HBx (HBV<sub>X-</sub>) (MOI of 200) in the presence or absence of Ad-HBx and the major viral transcript, pregenomic RNA measured at 6 days post-infection (a). HepG2-NTCP cells were transduced with Ad-HBx or Ad-OVA and HBx and HIF-1α expression assessed at selected times after culturing at either 20% or 1% oxygen (b). Data is shown from a single experiment and is representative of three independent experiments and mean data is presented. Normality distribution was assessed by D'Agostino-Pearson test; 2-way-ANOVA with Bonferroni correction was applied with p<0.05 deemed as significant.



**a** bioRxiv preprint doi: <https://doi.org/10.1101/2020.03.27.011841>; this version posted March 29, 2020. The copyright holder for this preprint (which was not certified by peer review) is the author/funder, who has granted bioRxiv a license to display the preprint in perpetuity. It is made available under a [CC-BY-NC-ND 4.0 International license](#).

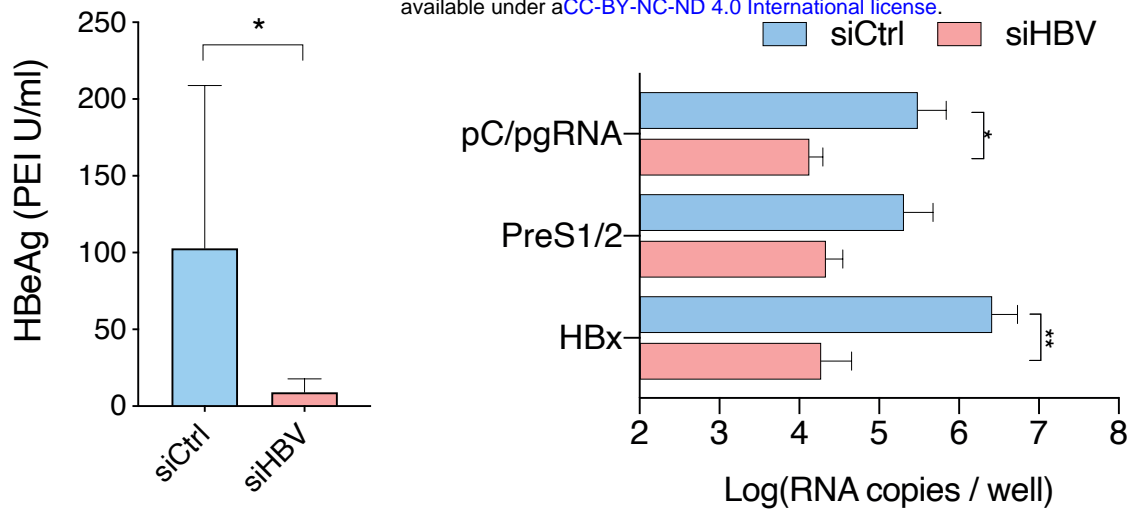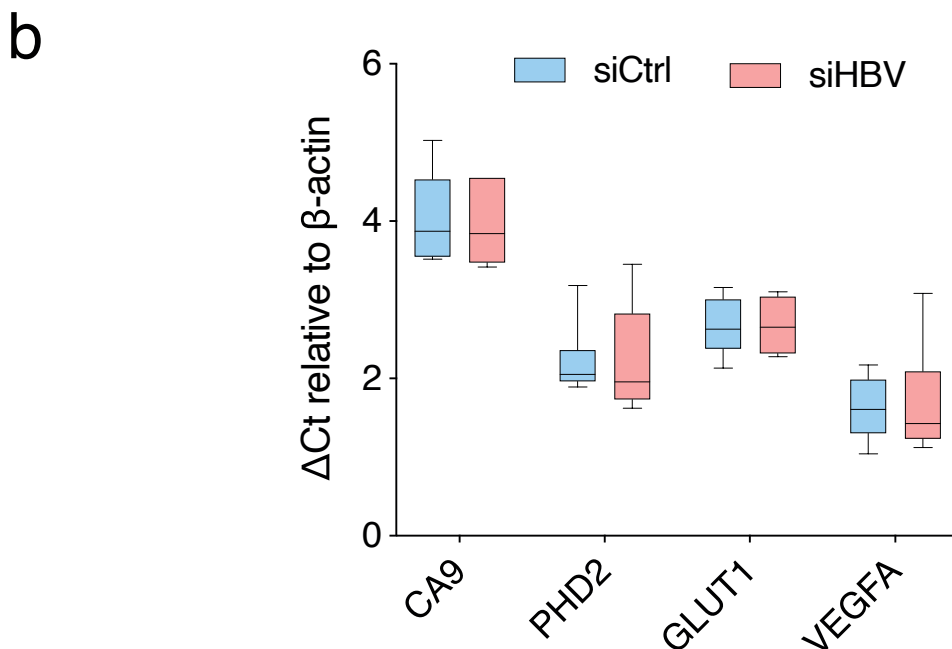

**Fig.4. Effect of silencing viral transcription in HBV transgenic mice on hypoxia target gene transcripts.** HBV transgenic mice (n=6 per group) were treated with liver directed siRNAs targeting the HBx region (siHBV) which is commonly shared by all viral RNAs or with a control siRNA (siCtrl). Seven days later we assessed the efficacy of siHBV silencing by quantifying: serum HBeAg levels (a), HBV RNAs in the liver (b) and hypoxia target gene (*CAIX*, *VEGFA*, *GLUT1* and *PHD2*) RNAs (d). Hypoxia target genes values are expressed as  $\Delta$ Ct values by subtracting the Ct value of the housekeeping gene  $\beta$ -actin from Ct value of the gene of interest. Mann Whitney test (a) or 2-way-ANOVA with Bonferroni correction (b) test were applied with  $p < 0.05$  deemed as significant.

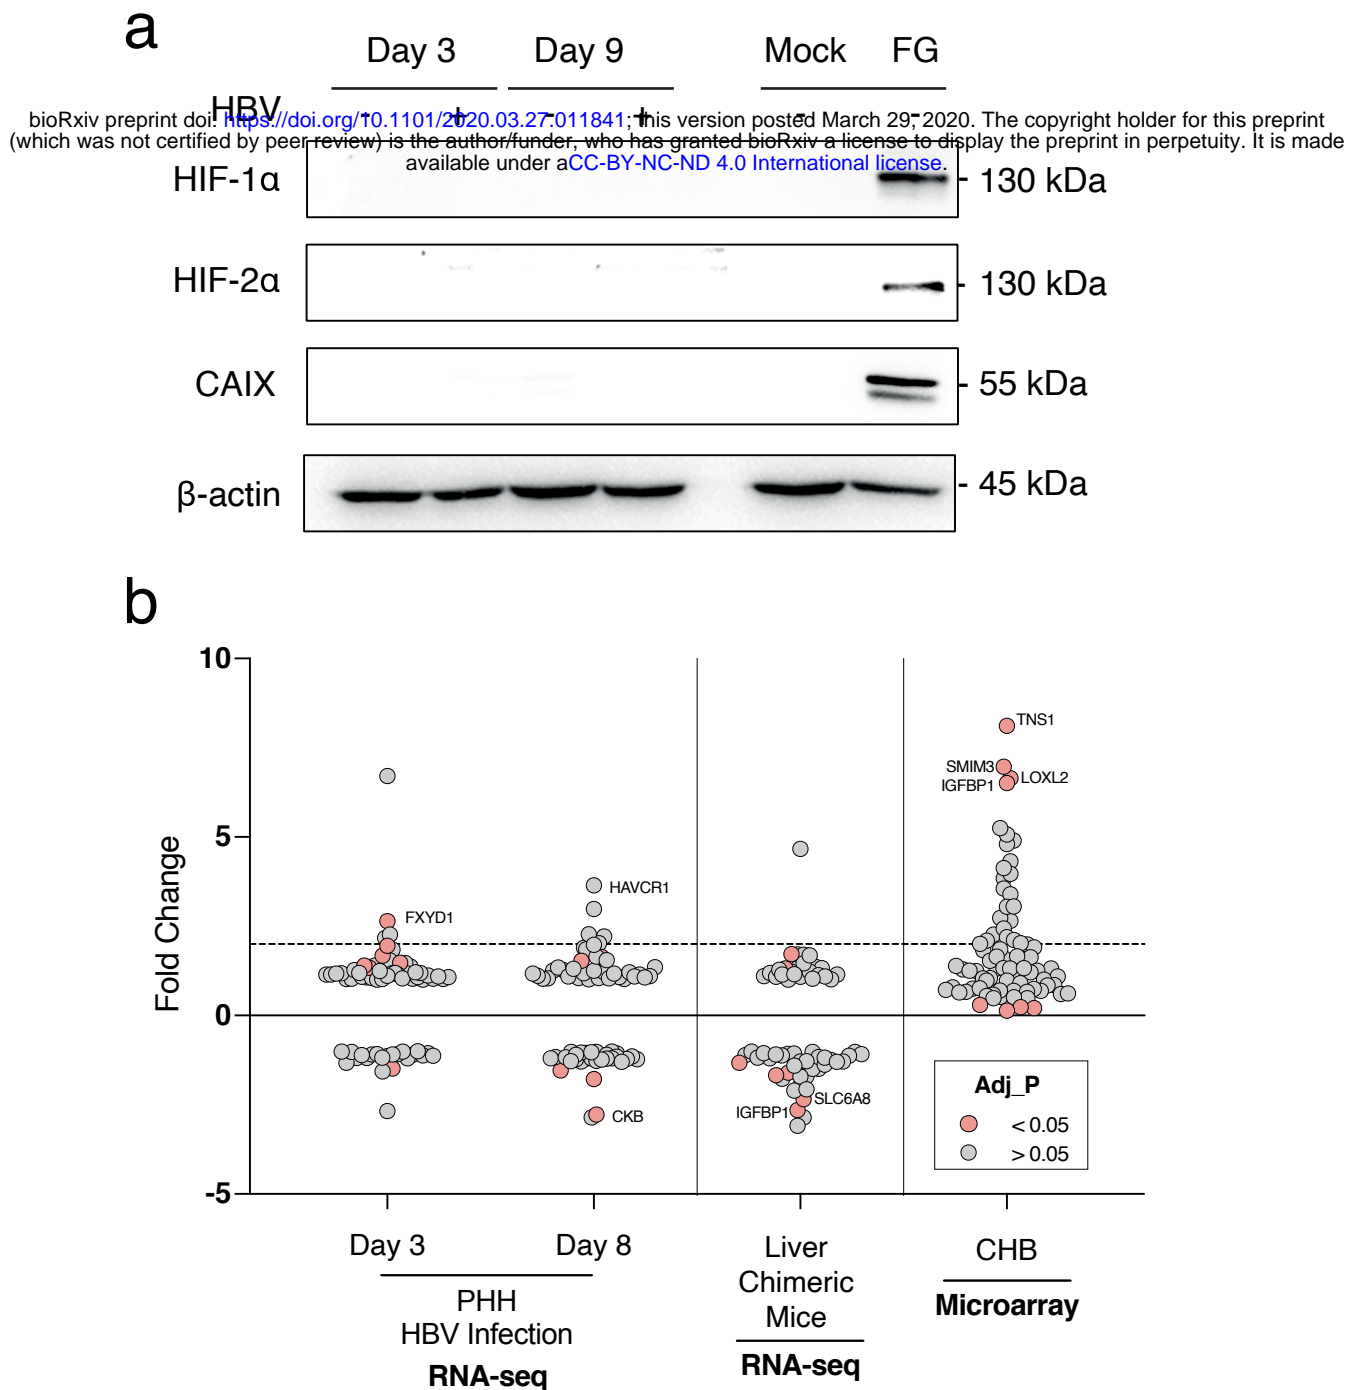

# Supplementary Table 1

## 80 Hypoxia signature genes

| Rank | Gene_Symbol | Gene_Description                                                             | Accession_Number(s)                                                                     |
|------|-------------|------------------------------------------------------------------------------|-----------------------------------------------------------------------------------------|
| 1    | LOXL2       | Lysyl oxidase like 2                                                         | NM_002318                                                                               |
| 2    | SMIM3       | Small integral membrane protein 3                                            | NM_032947                                                                               |
| 3    | LOC154761   | Family with sequence similarity 115, member c pseudogene                     | NR_015421                                                                               |
| 4    | WDR54       | Wd repeat domain 54                                                          | NM_032118 /// XM_005264586 /// XM_006712111                                             |
| 5    | DOK3        | Docking protein 3                                                            | NM_001144875 /// NM_001144876 /// NM_001308235 /// NM_001308236 /// NM_024872 /// XM_00 |
| 6    | HCAR3       | Hydroxycarboxylic acid receptor 3                                            | NM_006018                                                                               |
| 7    | EHD2        | Eh domain containing 2                                                       | NM_014601                                                                               |
| 8    | TNS1        | Tensin 1                                                                     | NM_001308022 /// NM_001308023 /// NM_022648 /// XM_011511711 /// XM_011511712 /// XM_01 |
| 9    | HK1         | Hexokinase 1                                                                 | NM_000188 /// NM_033496 /// NM_033497 /// NM_033498 /// NM_033500 /// XM_005269735 ///  |
| 10   | SLC2A3      | Solute carrier family 2 member 3                                             | NM_006931                                                                               |
| 11   | GYS1        | Glycogen synthase 1                                                          | NM_001161587 /// NM_002103 /// NR_027763                                                |
| 12   | PLAC8       | Placenta specific 8                                                          | NM_001130715 /// NM_001130716 /// NM_016619                                             |
| 13   | IGFBP1      | Insulin like growth factor binding protein 1                                 | NM_000596 /// NM_001013029                                                              |
| 14   | FXYD1       | Fxyd domain containing ion transport regulator 1                             | NM_001278717 /// NM_001278718 /// NM_005031 /// NM_021902                               |
| 15   | LSP1        | Lymphocyte-specific protein 1                                                | NM_001013253 /// NM_001013254 /// NM_001013255 /// NM_001242932 /// NM_001289005 /// NM |
| 16   | SLC6A8      | Solute carrier family 6 member 8                                             | NM_001142805 /// NM_001142806 /// NM_005629                                             |
| 17   | TFF1        | Trefoil factor 1                                                             | NM_003225                                                                               |
| 18   | TUBB1       | Tubulin beta 1 class vi                                                      | NM_030773                                                                               |
| 19   | RIMKLA      | Ribosomal modification protein rimk like family member a                     | NM_173642 /// XM_006710585                                                              |
| 20   | PFKFB3      | 6-phosphofructo-2-kinase/fructose-2,6-biphosphatase 3                        | NM_001145443 /// NM_001282630 /// NM_001314063 /// NM_004566 /// XM_005252463 /// XM_00 |
| 21   | CKB         | Creatine kinase b                                                            | NM_001823                                                                               |
| 22   | RASSF5      | Ras association domain family member 5                                       | NM_031437 /// NM_182663 /// NM_182664 /// NM_182665                                     |
| 23   | SLC51A      | Solute carrier family 51 alpha subunit                                       | NM_152672                                                                               |
| 24   | SPAG4       | Sperm associated antigen 4                                                   | NM_003116 /// XM_005260519 /// XM_005260520 /// XM_011529009 /// XM_011529010 /// XM_01 |
| 25   | HAVCR1      | Hepatitis a virus cellular receptor 1                                        | NM_001099414 /// NM_001173393 /// NM_001308156 /// NM_012206 /// XM_006714840 /// XM_01 |
| 26   | ANGPTL4     | Angiopoietin like 4                                                          | NM_001039667 /// NM_016109 /// NM_139314 /// NR_104213 /// XM_005272484 /// XM_00527248 |
| 27   | LOX         | Lysyl oxidase                                                                | NM_001178102 /// NM_001317073 /// NM_002317                                             |
| 28   | CA9         | Carbonic anhydrase 9                                                         | NM_001216 /// XM_006716869 /// XM_006716870 /// XR_428428                               |
| 29   | IGLON5      | Igln family member 5                                                         | NM_001101372                                                                            |
| 30   | PFKFB4      | 6-phosphofructo-2-kinase/fructose-2,6-biphosphatase 4                        | NM_004567 /// XM_005265230 /// XM_005265231 /// XM_011533829 /// XM_011533830 /// XM_01 |
| 31   | PLEKHA2     | Pleckstrin homology domain containing a2                                     | NM_021623 /// XM_011544605 /// XM_011544606 /// XM_011544607 /// XM_011544608           |
| 32   | LOXL3       | Lysyl oxidase like 3                                                         | NM_001289164 /// NM_001289165 /// NM_032603 /// XM_011533134                            |
| 33   | CHST15      | Carbohydrate (n-acetyl)galactosamine 4-sulfate 6-o) sulfotransferase 15      | NM_001270764 /// NM_001270765 /// NM_014863 /// NM_015892 /// XM_005269891 /// XM_00526 |
| 34   | TMCC1       | Transmembrane and coiled-coil domain family 1                                | NM_001017395 /// NM_001128224 /// NM_015008 /// NR_033361 /// XM_006713542 /// XM_00671 |
| 35   | BHLHE40     | Basic helix-loop-helix family member e40                                     | NM_003670                                                                               |
| 36   | EGFL7       | Egf like domain multiple 7                                                   | NM_016215 /// NM_201446 /// NR_045110 /// NR_045111 /// NR_046367 /// XM_006717141 ///  |
| 37   | EGLN3       | Egl-9 family hypoxia inducible factor 3                                      | NM_001308103 /// NM_022073 /// XM_006720015                                             |
| 38   | KCTD11      | Potassium channel tetramerization domain containing 11                       | NM_001002914                                                                            |
| 39   | FGF11       | Fibroblast growth factor 11                                                  | NM_001303460 /// NM_004112 /// NR_130156                                                |
| 40   | TMEM45A     | Transmembrane protein 45a                                                    | NM_018004 /// XM_005247569                                                              |
| 41   | ISM2        | Isthmin 2                                                                    | NM_182509 /// NM_199265 /// NM_199296 /// XM_011536489                                  |
| 42   | NDRG1       | N-myc downstream regulated 1                                                 | NM_001135242 /// NM_001258432 /// NM_001258433 /// NM_006096 /// XM_011516791 /// XM_01 |
| 43   | SERPINE1    | Serpin family e member 1                                                     | NM_000602 /// NM_001165413                                                              |
| 44   | ESPN        | Espin                                                                        | NM_031475 /// XM_005263501 /// XM_011542231 /// XM_011542232 /// XM_011542233 /// XM_01 |
| 45   | ADM         | Adrenomedullin                                                               | NM_001124                                                                               |
| 46   | RNASET2     | Ribonuclease t2                                                              | NM_003730                                                                               |
| 47   | FAM110C     | Family with sequence similarity 110 member c                                 | NM_001077710 /// XM_011510372 /// XM_011510373 /// XM_011510374                         |
| 48   | IGFBP3      | Insulin like growth factor binding protein 3                                 | NM_000598 /// NM_001013398                                                              |
| 49   | PDK1        | Pyruvate dehydrogenase kinase 1                                              | NM_001278549 /// NM_002610 /// NR_103729 /// NR_103731 /// XM_006712594 /// XM_00671259 |
| 50   | PDGFB       | Platelet derived growth factor subunit b                                     | NM_002608 /// NM_033016                                                                 |
| 51   | UNC93A      | Protein unc-93 homolog a                                                     | NM_001143947 /// NM_018974 /// XM_011535905 /// XM_011535906 /// XM_011535907 /// XM_01 |
| 52   | PPP2R2C     | Protein phosphatase 2 regulatory subunit bgamma                              | NM_001206994 /// NM_001206995 /// NM_001206996 /// NM_020416 /// NM_181876 /// XM_00524 |
| 53   | FAM13A      | Family with sequence similarity 13 member a                                  | NM_001015045 /// NM_001265578 /// NM_001265579 /// NM_001265580 /// NM_014883 /// XM_00 |
| 54   | PLIN2       | Perilipin 2                                                                  | NM_001122 /// NR_038064 /// XM_006716719                                                |
| 55   | GBE1        | Glycogen branching enzyme                                                    | NM_000158                                                                               |
| 56   | LCN15       | Lipocalin 15                                                                 | NM_203347 /// XM_006717105 /// XM_011518672                                             |
| 57   | ZNF395      | Zinc finger protein 395                                                      | NM_018660                                                                               |
| 58   | RAB42       | Ras-related protein rab-42                                                   | NM_001193532 /// NM_152304                                                              |
| 59   | PGK1        | Phosphoglycerate kinase 1                                                    | NM_000291                                                                               |
| 60   | PPP1R3C     | Protein phosphatase 2 regulatory subunit 3c                                  | NM_005398                                                                               |
| 61   | BNIP3L      | Bcl2/adenovirus e1b 19kDa protein-interacting protein 3-like                 | NM_004331 /// XM_005273617 /// XM_011544630                                             |
| 62   | ANKRD37     | Ankyrin repeat domain 37                                                     | NM_181726 /// XM_005262981                                                              |
| 63   | ANKZF1      | Ankyrin repeat and zinc finger domain containing 1                           | NM_001042410 /// NM_001282792 /// NM_018089 /// XM_005246663 /// XM_011511392 /// XR_42 |
| 64   | APOL1       | Apolipoprotein 11                                                            | NM_001136540 /// NM_001136541 /// NM_003661 /// NM_145343 /// NM_145344 /// XM_00526179 |
| 65   | DDIT4       | Dna damage inducible transcript 4                                            | NM_019058                                                                               |
| 66   | PNPLA7      | Patatin-like phospholipase domain-containing protein 7                       | NM_001098537 /// NM_152286 /// XM_006717102 /// XM_006717104 /// XM_011518664 /// XR_92 |
| 67   | BNIP3       | Bcl2 interacting protein 3                                                   | NM_004052                                                                               |
| 68   | RORA        | Rar related orphan receptor a                                                | NM_002943 /// NM_134260 /// NM_134261 /// NM_134262 /// XM_005254584 /// XM_011521873 / |
| 69   | NDUFA4L2    | Ndufa4 mitochondrial complex associated like 2                               | NM_020142 /// XM_005269033 /// XM_011538573                                             |
| 70   | PIGZ        | Phosphatidylinositol glycan anchor biosynthesis class z                      | NM_025163 /// XM_006713758 /// XM_011513190 /// XM_011513191 /// XM_011513192           |
| 71   | ABCA7       | Atp binding cassette transporter a7                                          | NM_019112 /// NM_033308 /// XM_006722616 /// XM_006722617 /// XM_006722618 /// XM_01152 |
| 72   | HR          | Protein hairless                                                             | NM_005144 /// NM_018411 /// XM_005273569 /// XM_006716367                               |
| 73   | EPO         | Erythropoietin                                                               | NM_000799                                                                               |
| 74   | TMEM145     | Transmembrane protein 145                                                    | NM_173633 /// XM_005258781 /// XM_011526791 /// XM_011526792                            |
| 75   | MIR210HG    | Mir210 host gene                                                             | NR_038262                                                                               |
| 76   | CITED2      | Cbp/p300 interacting transactivator with glu/asp rich coxy-terminal domain 2 | NM_001168388 /// NM_001168389 /// NM_006079                                             |
| 77   | PLOD2       | Procollagen-lysine,2-oxoglutarate 5-dioxygenase 2                            | NM_000935 /// NM_182943 /// XM_005247535 /// XM_005247536                               |
| 78   | INHHA       | Inhibin alpha                                                                | NM_002191                                                                               |
| 79   | BIRC7       | Baculoviral iap repeat containing 7                                          | NM_022161 /// NM_139317                                                                 |
| 80   | ALDOC       | Aldolase, fructose-bisphosphate c                                            | NM_005165 /// XM_005257949 /// XM_011524556                                             |
